# Supplementary material for: A hybrid anion exchanger with nanoscale zero valent iron for trace hexavalent chromium removal from drinking water
Source: Royal Society of Chemistry journal article supplement (doi:10.1039/d4va00246f), 2024-01-01
Supplement: d4va00246f2.xlsx [file d4va00246f2.xlsx]

## Sheet: Fig 4
Data for Figure 4
Isotherm of iron loading onto A600E resin.
	Initial Conditions			At 24 hours
Sample Number	Initial [Fe] (M)	Volume (mL)	Resin mass (g)	[Fe] (mg/L)	qFe (mg Fe/g resin)	Replicate qFe (mg Fe/g resin)	Standard Error qFe (mg Fe/g resin)
1	0.05	20	1	34.2847	46.8911	47.93	0.519455
2	0.05	30	1	98.0676	64.8907	–	–
3	0.05	40	1	231.856	78.2051	79.49	0.642436
4	0.075	20	1	228.745	66.0603	–	–
5	0.075	30	1	723.989	82.9507	–	–
6	0.075	40	1	1229.58	95.7567	–	–
7	0.1	20	1	762.881	75.2127	85.9	5.34367
8	0.1	30	1	1680.73	99.1434	–	–
9	0.1	40	1	2645.25	106.198	112.55	3.17599

## Sheet: Fig 7
Data for Fig. 7
Equilibrium isotherms of A600E and NZVI-A600E
Chromium Only Isotherm								Chromium + Sulfate Isotherm
Resin	A600E							Resin	A600E
Sample Number	Target Resin mass (g)	Actual Resin Mass (g)	Volume (L)	[Cr] (mg/L)	qCr (mg Cr(VI)/g resin)			Sample Number	Target Resin mass (g)	Actual Resin Mass (g)	Volume (L)	[Cr] (mg/L)	qCr (mg Cr(VI)/g resin)
1	0.05	0.0496	0.1	120.8	83.4677			1	0.05	0.0503	0.1	132.4	60.0398
2	0.05	0.0497	0.1	125.9	73.0382			2	0.05	0.0506	0.1	139.7	45.2569
3	0.05	0.0502	0.05	84.9	76.992			3	0.05	0.0497	0.05	116.7	46.1771
4	0.05	0.0499	0.05	82.9	79.4589			4	0.05	0.0503	0.05	115.5	46.8191
5	0.1	0.0998	0.05	24	69.2385			5	0.1	0.1004	0.05	90.6	35.8566
6	0.1	0.1	0.05	33.4	64.4			6	0.1	0.0997	0.05	87.5	37.663
7	0.4	0.4002	0.05	3.6	19.8151			7	0.4	0.3997	0.05	27.1	16.9502
8	0.4	0.4005	0.05	1.6	20.0499			8	0.4	0.4004	0.05	26.7	16.9705
9	0.1	0.1002	0.025	2.6	39.8204			9	0.1	0.1005	0.025	53.4	27.1642
10	0.1	0.0998	0.025	1.6	40.2305			10	0.1	0.1002	0.025	50.9	27.8693
11	0.4	0.4006	0.025	0.4	10.0974			11	0.4	0.4009	0.025	11.7	9.41008
12	0.4	0.3997	0.025	0.3	10.1263			12	0.4	0.4013	0.025	11.8	9.39447
Resin	NZVI-A600E							Resin	NZVI-A600E
Sample Number	Target Resin mass (g)	Actual Resin Mass (g)	Volume (L)	[Cr] (mg/L)	qCr (mg Cr(VI)/g resin) Uncorrected	qCr (mg Cr(VI)/g resin) Density Corrected		Sample Number	Target Resin mass (g)	Actual Resin Mass (g)	Volume (L)	[Cr] (mg/L)	qCr (mg Cr(VI)/g resin) Uncorrected	qCr (mg Cr(VI)/g resin) Density Corrected
1	0.05	0.0498	0.1	119.7	85.3414	96.4357		1	0.05	0.05	0.1	138.7	47.8	54.014
2	0.05	0.0504	0.1	122.9	77.9762	88.1131		2	0.05	0.05	0.1	138.3	48.6	54.918
3	0.05	0.0505	0.05	93.4	68.1188	76.9743		3	0.05	0.0497	0.05	118.3	44.5674	50.3612
4	0.05	0.0497	0.05	91.3	71.328	80.6006		4	0.05	0.0504	0.05	118.1	44.1468	49.8859
5	0.1	0.1004	0.05	30.6	65.5378	74.0578		5	0.1	0.1004	0.05	91.5	35.4084	40.0115
6	0.1	0.0999	0.05	42.4	59.96	67.7548		6	0.1	0.0999	0.05	87.9	37.3874	42.2477
7	0.4	0.4001	0.05	0.3	20.2324	22.8627		7	0.4	0.3998	0.05	20.5	17.7714	20.0817
8	0.4	0.3996	0.05	2.9	19.9324	22.5236		8	0.4	0.4008	0.05	19.8	17.8144	20.1302
9	0.1	0.1001	0.025	1.7	40.0849	45.296		9	0.1	0.0997	0.025	48	28.7362	32.4719
10	0.1	0.1002	0.025	1.5	40.0948	45.3071		10	0.1	0.1	0.025	60.3	25.575	28.8997
11	0.4	0.3998	0.025	0.2	10.1301	11.447		11	0.4	0.3996	0.025	6.1	9.79104	11.0639
12	0.4	0.3999	0.025	0.3	10.1213	11.437		12	0.4	0.3998	0.025	4.7	9.87369	11.1573

## Sheet: Fig 8
Data for Fig 8
Resin	A600E
Average Bed Volume (BV)	pH (–)	[Cr] (µg/L)	[SO42-] (mg/L)	[NO3-] (mg/L)
0	8.37	0.5	<1.2	<0.2
200	7.96	0.1	<1.2	<0.2
400	8.55	0.2	1.6	0.751616
530	9.45	0.8	20.8	3.6032
800	8.92	9.6	90.8	5.26462
1000	8.75	14.5	96.8	5.12761
1200	8.77	18.7	–	–
1390	8.78	22	–	–
1600	8.8	23	–	–
1780	8.8	26.2	–	–
2000	8.83	28.3	–	–
Resin	NZVI-A600E
Average Bed Volume (BV)	pH (–)	[Cr] (µg/L)	[SO42-] (mg/L)	[NO3-] (mg/L)		Avg Bed Volume (BV)	Sample Type	B (µg/L)	Notes		Average Bed Volume (BV)	Sample Type	Fe (µg/L)	Notes
0	–	–	<1.2	<0.2		200	Composite	4510.92			200	Composite	14554.8
100	–	–	<1.2	<0.2		300	Grab	2493.27			600	Composite	1618.3
200	9.1	–	1.75	0.311779		1044	Composite	66.1466			1044	Composite	30	<30, plot at MRL
300	9.05	0.1	2.596	0.565759		1287	Grab	50	<50, plot at MRL		1286.67	Grab	30	<30, plot at MRL
400	9.04	–	9.246	1.28295		1375	Grab	50	<50, plot at MRL		1375	Grab	30	<30, plot at MRL
500	9	–	55.12	3.52469		1460	Grab	50	<50, plot at MRL		1460	Grab	30	<30, plot at MRL
600	–	–	–			1635	Composite	50	<50, plot at MRL
700	8.93	–	104.658	4.74092		1810	Grab	50	<50, plot at MRL
800	8.88	–	101.59	4.76585
1286.67	8.87	0.2	103.786	5.09544
1375	8.88	0.1	100.926	5.01456
1460	8.85	0.2	–	–
1810	8.87	0.4	–	–
1940	8.87	0.8	–	–
2350	8.87	3.4	–	–
2880	8.88	9.6	–	–
3380	8.84	18.2	–	–
3740	8.84	24.1	–	–
